# Supplementary material for: The Expression of a Novel Mitochondrially-Encoded Gene in Gonadic Precursors May Drive Paternal Inheritance of Mitochondria
Source: PubMed Central journal article supplement (PMC4560408; doi:10.1371/journal.pone.0137468), 2015-09-04

### S3 Fig. Relationships between the transcription level of *vasph* and mitochondrial targets.

Axes in juveniles: Log10 copy number ("absolute quantification" with standard dilutions).

Green dots in juveniles: biological class B1

Black dots in juveniles: biological class B2

Axes in adults: Log10 copy number relative to *18S* (relative quantification with *18S* as nuclear endogenous control).

Dashed line: equal transcription line ( $x=y$ )

Red line: regression line (shown only when the correlation is statistically supported)

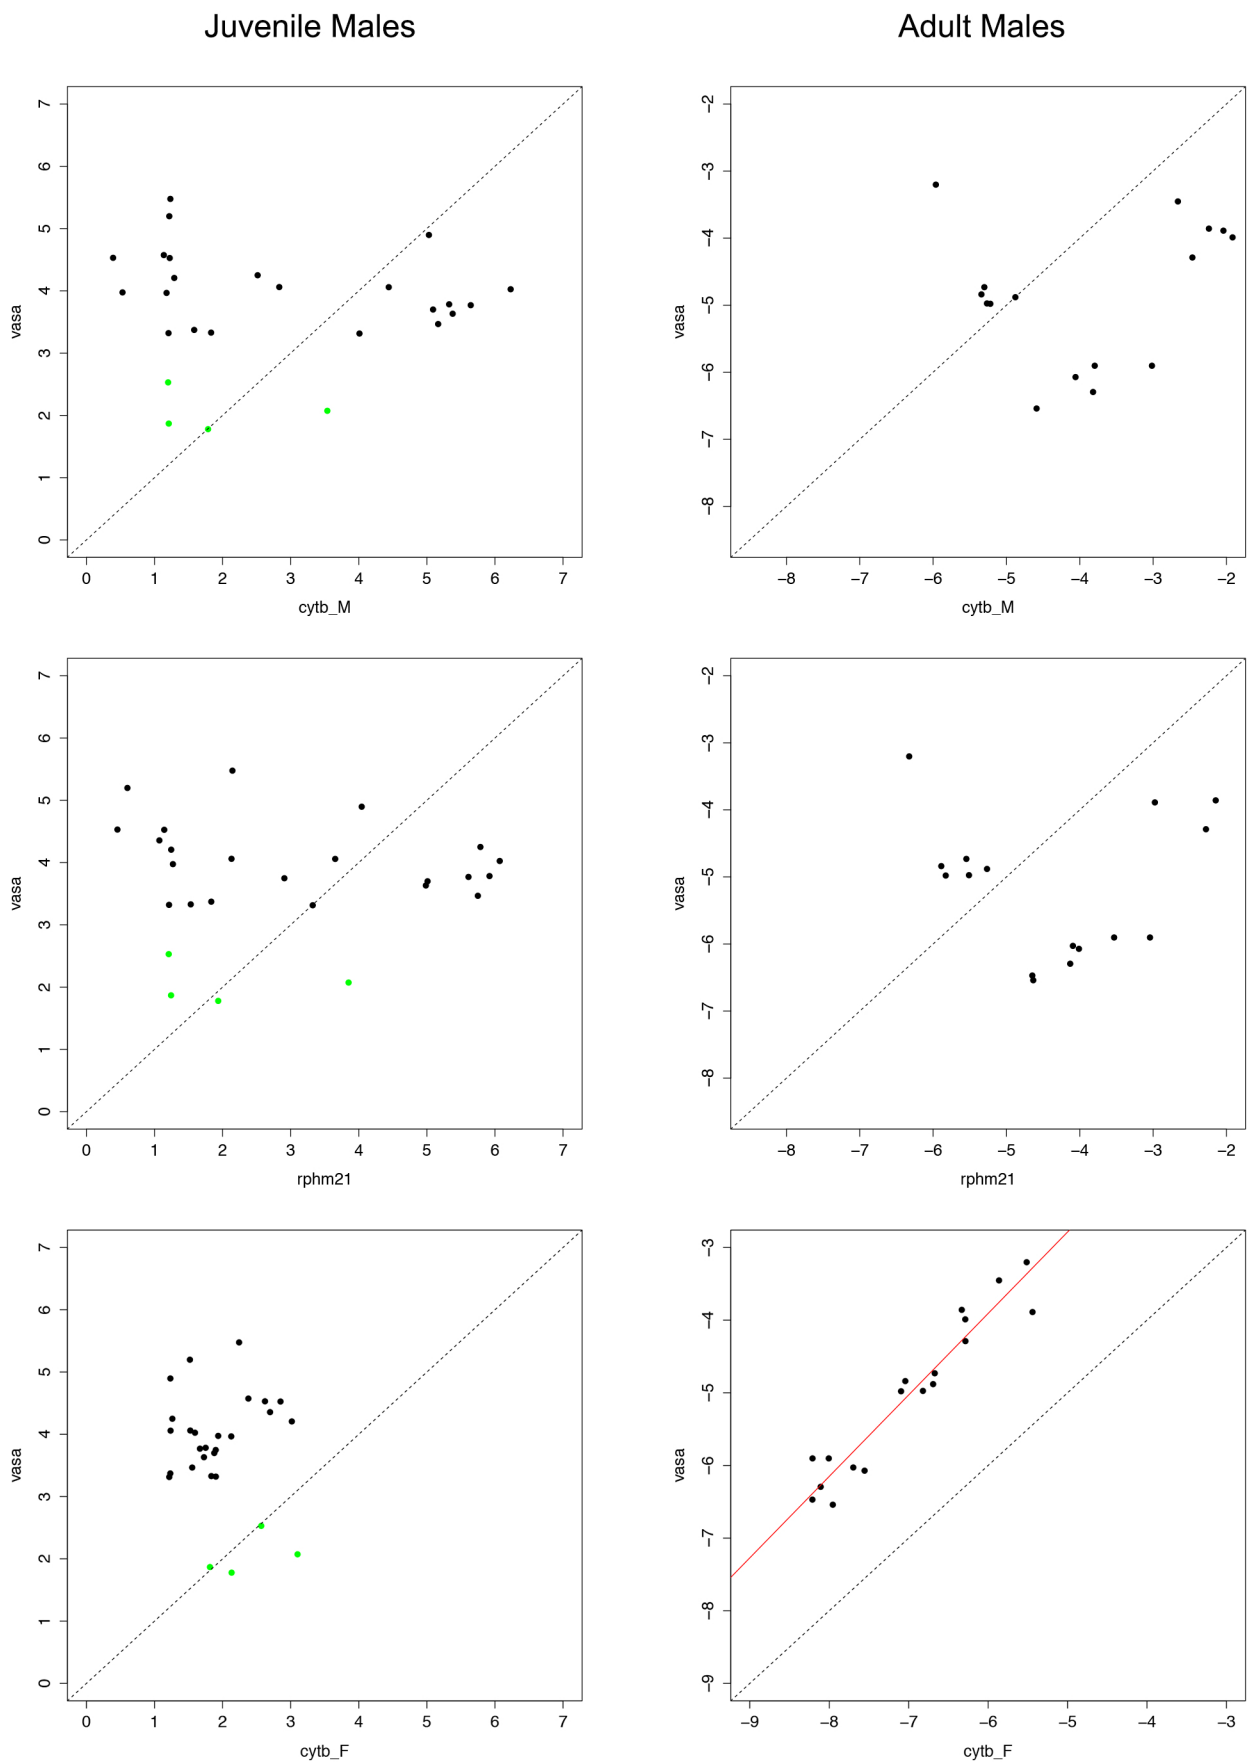

Supplement: pone.0137468.s003.pdf [file pone.0137468.s003.pdf]
