# Supplementary material for: The Expression of a Novel Mitochondrially-Encoded Gene in Gonadic Precursors May Drive Paternal Inheritance of Mitochondria
Source: PubMed Central journal article supplement (PMC4560408; doi:10.1371/journal.pone.0137468), 2015-09-04
Supplement: pone.0137468.s006.pdf [file pone.0137468.s006.pdf]

## S1 Table. Primers used in Real-Time qPCR.

| target                  | primer 3'-5'                   | product (bp) |
|-------------------------|--------------------------------|--------------|
| Rph_SYBR_18S_forward*   | TTCAAATGTCTGCCCTATCAACTG       | 136          |
| Rph_SYBR_18S_reverse*   | GCCTGCTGCCTTCCTTGG             |              |
| Rph_SYBR_cytbM_forward* | GTTGGGATAGTTTTAATAGGTTTG       | 126          |
| Rph_SYBR_cytbM_reverse* | TTCGGGCTGAATATGGAC             |              |
| Rph_SYBR_orf21_forward* | TCTGTGAAAGGAAACCCATGTGAG       | 129          |
| Rph_SYBR_orf21_reverse* | ACTAATAATAATTGGAGCCGAATAAACTTG |              |
| Rph_SYBR_cytbF_forward  | GTGCCAAATAAATTAGGTGGTATTAGA    | 109          |
| Rph_SYBR_cytbF_reverse  | CCATATTTATTCTTACACCTCGAAAAA    |              |
| Rph_SYBR_vasa_forward   | GCACGATTCGACTCCGGGATG          | 115          |
| Rph_SYBR_vasa_reverse   | GCCAGCTGTGGAAACACTGCCT         |              |

(\* from: Milani L, Ghiselli F, Iannello M, Passamonti M. 2014. Evidence for somatic transcription of male-transmitted mitochondrial genome in the DUI species *Ruditapes philippinarum* (Bivalvia: Veneridae). *Curr Genet.* 60:163–173.)
