# Supplementary material for: The Expression of a Novel Mitochondrially-Encoded Gene in Gonadic Precursors May Drive Paternal Inheritance of Mitochondria
Source: PubMed Central journal article supplement (PMC4560408; doi:10.1371/journal.pone.0137468), 2015-09-04
Supplement: pone.0137468.s007.pdf [file pone.0137468.s007.pdf]

**S2 Table. Juvenile sample for qPCR: subdivision in size and biological classes.**

| <b>Individual</b> | <b>Biological class</b> | <b>mt type</b> |
|-------------------|-------------------------|----------------|
| J01_0             | 0                       | U              |
| J02_0             | 0                       | U              |
| J03_0             | 0                       | U              |
| J04_0             | 0                       | U              |
| J05_0             | 0                       | U              |
| J01_1             | 0                       | U              |
| J02_1             | 0                       | U              |
| J03_1             | 0                       | U              |
| J04_1             | 0                       | U              |
| J05_1             | 0                       | U              |
| J06_1             | 0                       | U              |
| J01_2             | 0                       | U              |
| J02_2             | 0                       | U              |
| J03_2             | 1                       | m              |
| J04_2             | 1                       | m              |
| J05_2             | 1                       | m              |
| J01_3             | 1                       | m              |
| J02_3             | 1                       | M              |
| J03_3             | 1                       | M              |
| J04_3             | 1                       | m              |
| J05_3             | 1                       | M              |
| J01_4             | 2                       | m              |
| J02_4             | 2                       | m              |
| J03_4             | 2                       | m              |
| J04_4             | 2                       | M              |
| J05_4             | 2                       | M              |
| J06_4             | 1                       | M              |
| J01_5             | 2                       | M              |
| J02_5             | 2                       | M              |
| J03_5             | 2                       | M              |
| J04_5             | 2                       | m              |
| J05_5             | 2                       | M              |
| J06_5             | 2                       | M              |
| J07_5             | 2                       | M              |
| J08_5             | 2                       | M              |
| J09_5             | 2                       | M              |
| J10_5             | 2                       | m              |
| J01_6             | 2                       | M              |
| J02_6             | 2                       | M              |
| J03_6             | 2                       | M              |
| J04_6             | 2                       | m              |
| J05_6             | 2                       | m              |

|       |   |   |
|-------|---|---|
| J06_6 | 2 | m |
| J07_6 | 2 | M |
| J08_6 | 2 | m |
| J09_6 | 2 | M |
| J10_6 | 2 | M |
| J01_7 | 2 | M |
| J02_7 | 2 | m |
| J03_7 | 2 | M |
| J04_7 | 2 | M |
| J05_7 | 2 | m |
| J06_7 | 2 | M |
| J07_7 | 2 | M |
| J08_7 | 2 | M |
| J09_7 | 2 | M |

---

Acronyms:

J = juvenile;

first number = specimen number;

second number = size class.

Note:

U = undetermined;

m = absence of M-type mtDNA;

M = presence of M-type mtDNA.
