# Supplementary material for: The Expression of a Novel Mitochondrially-Encoded Gene in Gonadic Precursors May Drive Paternal Inheritance of Mitochondria
Source: PubMed Central journal article supplement (PMC4560408; doi:10.1371/journal.pone.0137468), 2015-09-04
Supplement: pone.0137468.s008.pdf [file pone.0137468.s008.pdf]

**S3 Table. Summary of the juvenile samples used for the different analyses.**

| <b>Size class</b> | <b>valve length</b> | <b>Sc N° qPCR</b> | <b>Biological class</b> | <b>Bc N° qPCR</b> | <b>valve length</b> | <b>Bc N° imm.</b> |
|-------------------|---------------------|-------------------|-------------------------|-------------------|---------------------|-------------------|
| S0                | 1-2 mm              | 5                 | B0                      | 13                | 1-5 mm              | -                 |
| S1                | 3 mm                | 6                 |                         |                   |                     |                   |
| S2                | 5-6 mm              | 5                 | B1                      | 9                 | 6-7 mm              | 13                |
| S3                | 8 mm                | 5                 |                         |                   |                     |                   |
| S4                | 9-15 mm             | 6                 | B2                      | 35                | 8-25 mm             | 6                 |
| S5                | 18-20 mm            | 10                |                         |                   |                     |                   |
| S6                | 21 mm               | 10                |                         |                   |                     |                   |
| S7                | 25 mm               | 10                |                         |                   |                     |                   |

Sc = size class;

Bc = biological class;

N° = number of samples used;

imm. = immunohistochemistry.
