# Supplementary material for: The Expression of a Novel Mitochondrially-Encoded Gene in Gonadic Precursors May Drive Paternal Inheritance of Mitochondria
Source: PubMed Central journal article supplement (PMC4560408; doi:10.1371/journal.pone.0137468), 2015-09-04
Supplement: pone.0137468.s009.pdf [file pone.0137468.s009.pdf]

**S4 Table. Transcription correlation statistics.**

| <b>Group</b>     | <b>Comparison</b> | <b>df</b> | <b>lm adj R<sup>2</sup></b> | <b>Pearson's r</b> | <b>p-value</b> | <b>Significance</b> | <b>Fig.</b> |
|------------------|-------------------|-----------|-----------------------------|--------------------|----------------|---------------------|-------------|
| Juvenile Females | vasa - cytb_F     | 14        | 0.52                        | 0.74               | 9.84E-04       | ***                 | 2A          |
| Adult Females    | vasa - cytb_F     | 12        | 0.95                        | 0.98               | 1.56E-09       | ***                 | 2B          |
| Juvenile Males   | vasa - cytb_M     | 24        | 0.04                        | -0.03              | 8.82E-01       | ns                  | S3          |
| Adult Males      | vasa - cytb_M     | 14        | 0.02                        | 0.22               | 4.16E-01       | ns                  | S3          |
| Juvenile Males   | vasa - rphm21     | 24        | 0.04                        | 0.01               | 9.56E-01       | ns                  | S3          |
| Adult Males      | vasa - rphm21     | 14        | 0.07                        | -0.04              | 8.88E-01       | ns                  | S3          |
| Juvenile Males   | rphm21 - cytb_M   | 22        | 0.82                        | 0.91               | 9.52E-10       | ***                 | S4          |
| Adult Males      | rphm21 - cytb_M   | 12        | 0.94                        | 0.97               | 5.52E-09       | ***                 | S4          |
| Juvenile Males   | cytb_M - cytb_F   | 24        | 0.17                        | -0.46              | 1.93E-02       | *                   | S4          |
| Adult Males      | cytb_M - cytb_F   | 14        | 0.03                        | 0.19               | 4.86E-01       | ns                  | S4          |
| Juvenile Males   | rphm21 - cytb_F   | 24        | 0.16                        | -0.44              | 2.46E-02       | *                   | S4          |
| Adult Males      | rphm21 - cytb_F   | 14        | 0.07                        | -0.05              | 8.50E-01       | ns                  | S4          |

df = degrees of freedom;

sn = non significant;

S = Supplementary figure.
